# Supplementary material for: High selectivity of photocatalytic reduction of CO2 to CO based on terpyridine ligand supported CuI metal organic framework
Source: Frontiers journal article supplement (doi:10.3389/fchem.2022.974907), 2022-08-05
Supplement: Data_Sheet_1.PDF [file Data_Sheet_1.PDF]

## *Supplementary Material*

### **High Selectivity of Photocatalytic Reduction of CO<sub>2</sub> to CO based on Terpyridine Ligand Supported Cu<sup>I</sup> Metal Organic Framework**

**Wen-Dong Zhang<sup>1</sup>, Yun Wang<sup>2†</sup>, Yi Liang<sup>2†</sup>, Ai-Lin Jiang<sup>2†</sup>, Hao Gong<sup>1</sup>, Xiao-Ying Tian<sup>1</sup>, Yi Wang<sup>1</sup>, Wen-Sheng Fu<sup>1\*</sup>, Jia-Zhen Liao<sup>3</sup>, Peng Chen<sup>2\*</sup>, Ying-Zhao Ma<sup>1\*</sup>**

<sup>1</sup> Chongqing Key Laboratory of Green Synthesis and Application, College of Chemistry, Chongqing Normal University, Chongqing, China

<sup>2</sup> Chongqing Key Laboratory of Inorganic Functional Materials, College of Chemistry, Chongqing Normal University, Chongqing, China

<sup>3</sup> Chongqing College of Electronic Engineering, Chongqing, China

<sup>4</sup> Research Center for Environmental Science & Technology, Institute of Fundamental and Frontier Sciences, University of Electronic Science and Technology of China, Chengdu, China

**\* Correspondence:**

Ying-Zhao Ma

yzma@cqnu.edu.cn

Wen-Sheng Fu

fuwensheng@cqnu.edu.cn

Peng Chen

ctbupengchen@126.com

<sup>†</sup>These authors have contributed equally to this work and share first authorship

## 1 Crystallographic appendix

Crystallographic data sets were collected with either Mo K $\alpha$  radiation (0.71073 Å). Suitable single crystals were covered in parabar oil, placed on a nylon loop mounted in a CrystalCap Magnetic<sup>TM</sup> holder (Hampton Research) and immediately transferred to the diffractometer. Data were corrected for Lorentz and polarization effects, as well as for absorption (numerical integration using a Gaussian grid, including beam profile effects). The program suite CrysAlisPRO (Rigaku Oxford Diffraction) was used for data collection, multi-scan absorption correction and data reduction. Each structure was solved by intrinsic phasing using SHELXT-2016 (Sheldrick, 2015b) and refined by full-matrix least-squares methods on F<sup>2</sup> with SHELXL2016 (Sheldrick, 2015a) in the software OLEX2. The structures were checked for higher symmetry with the help of the program PLATON (Spek, 2003). After anisotropic refinement of the non-H atoms, hydrogens were placed in geometrically calculated positions and each was assigned a fixed isotropic displacement parameter with a value equal to 1.2U<sub>iso</sub> of its parent C atom (1.5U<sub>iso</sub> for methyl groups) and refined with a riding model.

**Table S1.** Crystallographic table

| Compound              | Cu <sup>I</sup> MOF                                              |
|-----------------------|------------------------------------------------------------------|
| Formula               | C <sub>108</sub> H <sub>63</sub> Cu <sub>9</sub> N <sub>27</sub> |
| $\mu/\text{mm}^{-1}$  | 2.683                                                            |
| Formula weight        | 2310.81                                                          |
| Color                 | Yellow                                                           |
| Shape                 | Block                                                            |
| Size/mm <sup>3</sup>  | 0.04 × 0.03 × 0.01                                               |
| T/K                   | 100(2)                                                           |
| Crystal system        | orthorhombic                                                     |
| Space group           | Pbcn                                                             |
| a/Å                   | 20.6917(6)                                                       |
| b/Å                   | 14.3705(3)                                                       |
| c/Å                   | 64.916(2)                                                        |
| $\alpha/^\circ$       | 90                                                               |
| $\beta/^\circ$        | 90                                                               |
| $\gamma/^\circ$       | 90                                                               |
| Volume/Å <sup>3</sup> | 19302.9(9)                                                       |
| Z                     | 2                                                                |
| Wavelength/Å          | 1.54184                                                          |

|                           |                                       |
|---------------------------|---------------------------------------|
| Radiation type            | Cu K $\alpha$ ( $\lambda = 1.54184$ ) |
| $\Theta_{min}/^\circ$     | 5.064                                 |
| $\Theta_{max}/^\circ$     | 140.432                               |
| Measured Refl.            | 62989                                 |
| Independent Refl.         | 16600                                 |
| Reflections Used          | 18248                                 |
| $R_{int}$                 | 0.01221                               |
| Parameters                | 1300                                  |
| Restraints                | 72                                    |
| Largest Peak              | 1.29                                  |
| Deepest Hole              | -1.14                                 |
| GooF                      | 1.438                                 |
| $wR_2$ (all data)         | 0.3927                                |
| $wR_2$                    | 0.3265                                |
| $R_I$ (all data)          | 0.1647                                |
| $R_I$                     | 0.1158                                |
| $\rho_{calc}/\text{cm}^3$ | 1.590                                 |
| $\mu/\text{mm}^{-1}$      | 2.638                                 |
| F(000)                    | 9288.0                                |

|                                               |                                                                    |
|-----------------------------------------------|--------------------------------------------------------------------|
| Radiation                                     | Cu K $\alpha$ ( $\lambda = 1.54184$ )                              |
| 2 $\Theta$ range for data collection/°        | 5.064 to 140.432                                                   |
| Index ranges                                  | $-21 \leq h \leq 24$ , $-16 \leq k \leq 16$ , $-76 \leq l \leq 74$ |
| Reflections collected                         | 62989                                                              |
| Independent reflections                       | 16600 [ $R_{\text{int}} = 0.1221$ , $R_{\text{sigma}} = 0.0678$ ]  |
| Data/restraints/parameters                    | 16600/72/1300                                                      |
| Goodness-of-fit on $F^2$                      | 1.438                                                              |
| Final R indexes [ $I \geq 2\sigma(I)$ ]       | $R_1 = 0.1158$ , $wR_2 = 0.3265$                                   |
| Final R indexes [all data]                    | $R_1 = 0.1647$ , $wR_2 = 0.3927$                                   |
| Largest diff. peak/hole / e $\text{\AA}^{-3}$ | 1.29/-1.14                                                         |

---

**Table S2.** Selected Bond Distances (Å) and angles (°) for Cu<sup>I</sup> MOF

| <b>Cu<sup>I</sup> MOF</b> |           |                      |           |         |           |
|---------------------------|-----------|----------------------|-----------|---------|-----------|
| Cu1-N9 <sup>2</sup>       | 1.949(11) | Cu4-N3               | 1.951(12) | Cu6-N24 | 2.018(7)  |
| Cu1-N10 <sup>1</sup>      | 2.029(8)  | Cu4-N26              | 2.030(8)  | Cu7-N12 | 2.047(9)  |
| Cu2-N1                    | 1.881(8)  | Cu5-N4               | 1.877(8)  | Cu8-N7  | 1.892(9)  |
| Cu2-N2                    | 1.890(8)  | Cu5-N5               | 1.885(7)  | Cu8-N14 | 2.114(7)  |
| Cu2-N20 <sup>3</sup>      | 2.095(7)  | Cu5-N22 <sup>4</sup> | 2.109(7)  | Cu9-N8  | 1.896(10) |
| Cu3-N16 <sup>3</sup>      | 2.035(7)  | Cu6-N6               | 1.968(10) | Cu9-N18 | 2.030(7)  |
| C1-Cu1-N92                | 127.3(3)  | N5-Cu5-N224          | 102.2(3)  |         |           |
| C1-Cu1-N101               | 125.7(3)  | C5-Cu6-N6            | 125.6(3)  |         |           |
| N92-Cu1-N101              | 107.0(3)  | C5-Cu6-N24           | 133.8(3)  |         |           |
| N1-Cu2-N2                 | 154.3(3)  | N6-Cu6-N24           | 100.3(3)  |         |           |
| N1-Cu2-N203               | 103.6(3)  | C6-Cu7-C7            | 134.2(4)  |         |           |
| N2-Cu2-N203               | 102.0(3)  | C6-Cu7-N12           | 110.2(4)  |         |           |
| C2-Cu3-C3                 | 131.3(4)  | C7-Cu7-N12           | 115.6(4)  |         |           |
| C2-Cu3-N163               | 127.8(3)  | C8-Cu8-N7            | 153.9(4)  |         |           |
| C3-Cu3-N163               | 100.7(3)  | C8-Cu8-N14           | 104.0(3)  |         |           |
| C4-Cu4-N3                 | 129.4(4)  | N7-Cu8-N14           | 102.1(3)  |         |           |
| C4-Cu4-N26                | 127.4(4)  | C9-Cu9-N18           | 106.5(3)  |         |           |
| N3-Cu4-N26                | 103.1(3)  | N8-Cu9-C9            | 131.2(4)  |         |           |

N4-Cu5-N5

156.5(3)

N8-Cu9-N18

122.3(3)

N4-Cu5-N224

101.2(3)

---

Symmetry code for **1**: <sup>1</sup> $1-x, +y, 3/2-z$ ; <sup>2</sup> $-1+x, 1-y, 1/2+z$ ; <sup>3</sup> $1-x, -y, 1-z$ ; <sup>4</sup> $1-x, 2-y, 1-z$ ;

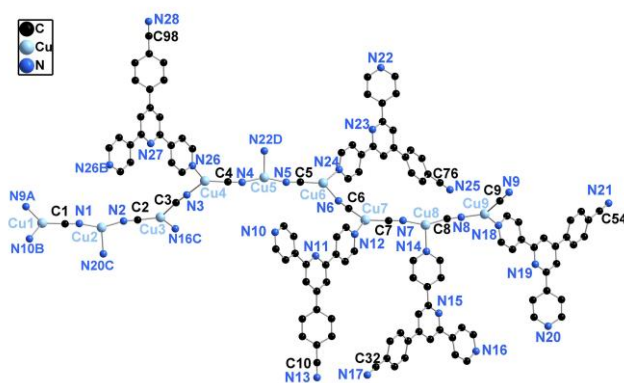

**Figure S1.** View of the coordination environments of compound 1. All H atoms and lattice water molecules are omitted for clarity. Symmetry codes: A (-1+x, 1-y, 1/2+z); B (1-x, y, 3/2-z); C (1-x, -y, 1-z); D (1-x, 2-y, 1-z)



## 2 Photocatalytic stability of Cu<sup>I</sup> MOF

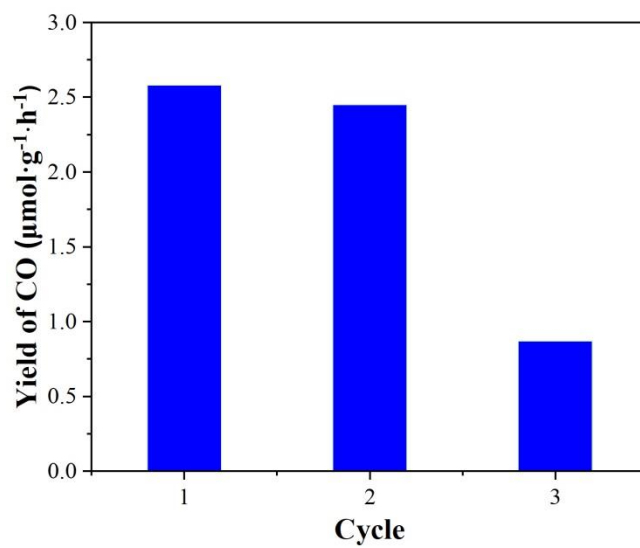

**Figure S2.** The cycling activity test of Cu<sup>I</sup> MOF

### 3 The band structure of Cu<sup>I</sup> MOF

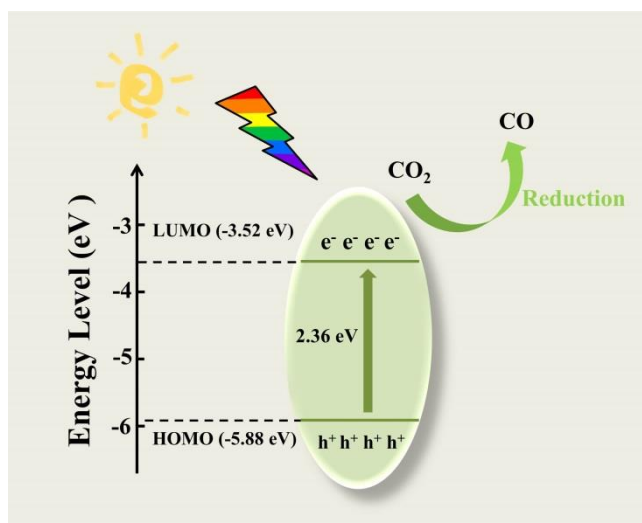

**Figure S3.** The diagram of band structure for Cu<sup>I</sup> MOF

## References

- SHELDRICK, G. 2015a. Crystal structure refinement with SHELXL. *Acta Crystallographica Section C*, 71, 3-8.
- SHELDRICK, G. 2015b. SHELXT - Integrated space-group and crystal-structure determination. *Acta Crystallographica Section A*, 71, 3-8.
- SPEK, A. 2003. Single-crystal structure validation with the program PLATON. *Journal of Applied Crystallography*, 36, 7-13.
